# Supplementary material for: Identification of novel cis-regulatory elements of Eya1 in Xenopus laevis using BAC recombineering
Source: PubMed Central journal article supplement (PMC5670250; doi:10.1038/s41598-017-15153-7), 2017-11-03
Supplement: 41598_2017_15153_MOESM1_ESM.pdf [file 41598_2017_15153_MOESM1_ESM.pdf]

**Identification of novel cis-regulatory elements of *Eya1* in *Xenopus laevis*  
using BAC recombineering**

Santosh Kumar Maharana, Nicolas Pollet, Gerhard Schlosser

**Supplemental material**

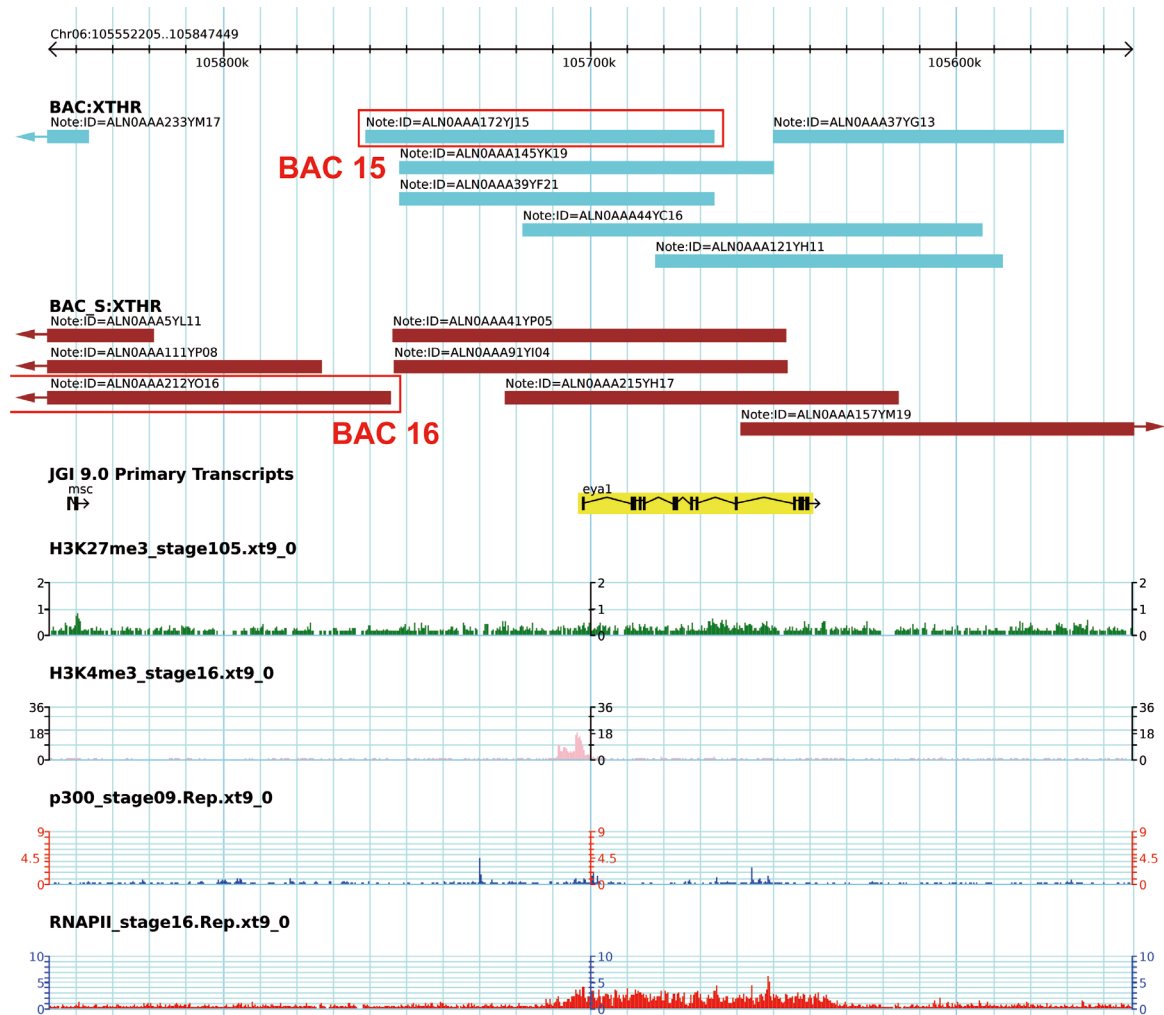

**Suppl. Fig. 1. Alignment of various BACs with the *Eya1* genomic region in *X. tropicalis*.** Screenshot from *Xenopus tropicalis* Version 9.0 Genome browser (<http://www.xenbase.org/>) using the community track named xthr.out.parsed.ALLBAC.gff). The position of various BACs from a *X. tropicalis* BAC library<sup>34</sup> relative to *Eya1* is indicated and the two BACs analyzed here, termed BAC15 and BAC16, are highlighted. Note that the precise position of the plus end (right side) has not been reported for BAC16 (see Suppl. Table 1).

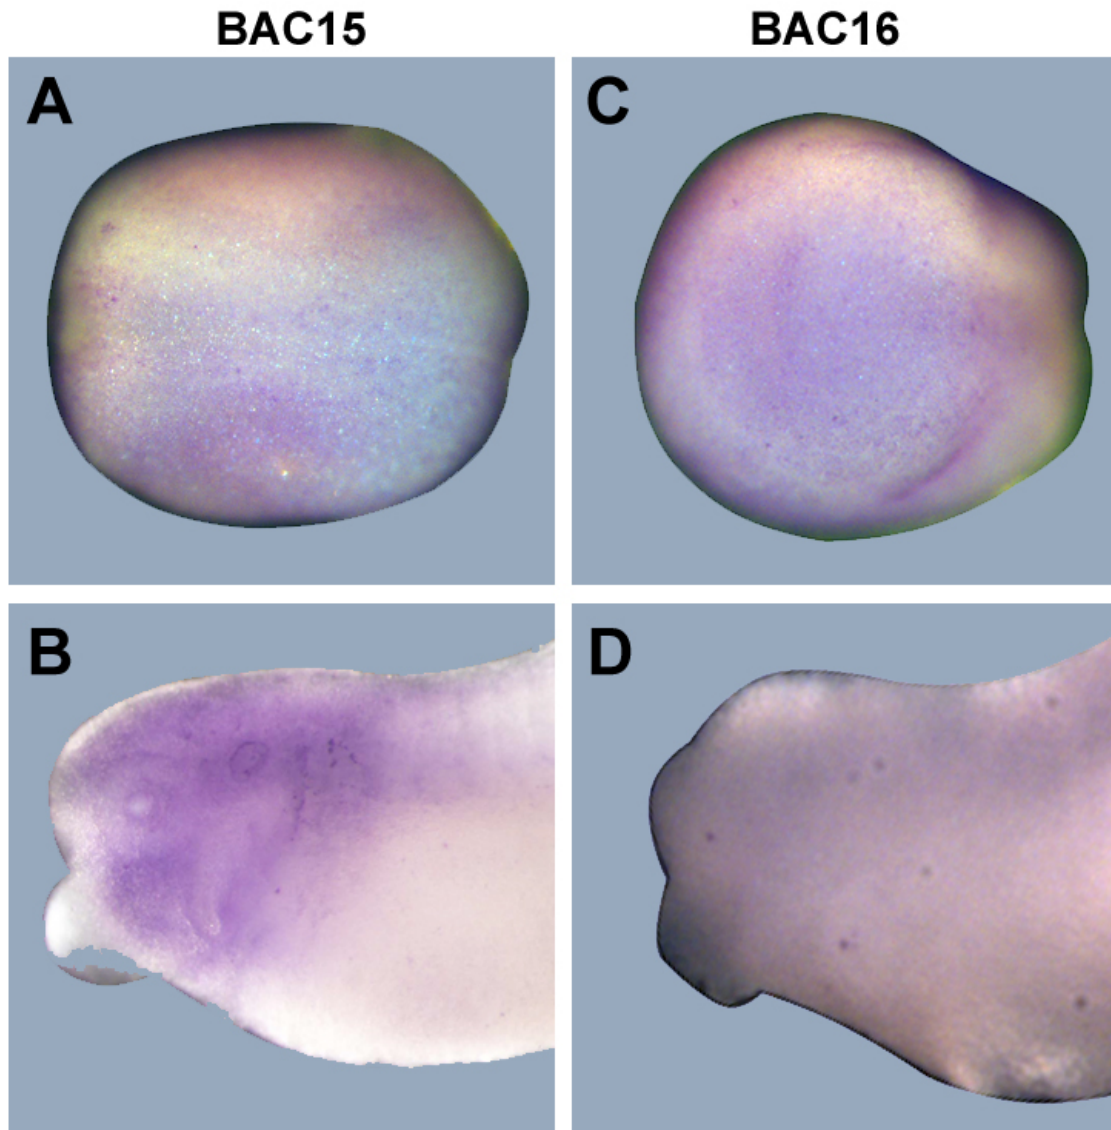

**Suppl. Fig. 2. Control embryos injected with BACs without reporter cassettes.** Embryos of *Xenopus laevis* at neural plate (A, C: dorsal view, anterior to the left) and tailbud stages (B, D: lateral view, anterior to the left) after injection with BAC15 (A,B) or BAC16 (C,D) constructs at the one-cell stage. In the absence of reporter cassettes, no expression domains are observed after in situ hybridization for *GFP*.

Suppl. Table 1

BACs covering the *Eya1* coding region and its vicinity

| BAC Identifier | Size (bp) | End Seq Genbank      | End Seq orientation | Chr. 06 map <sup>1</sup>                 | Name used here |
|----------------|-----------|----------------------|---------------------|------------------------------------------|----------------|
| ALN0AAA37YG13  | 79 030    | JY026638<br>JS989568 | minus<br>plus       | 105 650 055<br>105 571 025               | BAC13          |
| ALN0AAA44YC16  | 125 252   | JY073067<br>JY014952 | minus<br>plus       | 105 718 400<br>105 593 148               | BAC16A         |
| ALN0AAA111YP08 | 94 084    | JS920919<br>JS970870 | minus<br>plus       | 105 880 209<br>105 786 125               | BAC08          |
| ALN0AAA145YK19 | 101 712   | JY006731<br>JY006221 | minus<br>plus       | 105 751 764<br>105 650 052               | BAC19          |
| ALN0AAA172YJ15 | 94 591    | JS939121<br>JS973010 | minus<br>plus       | 105 760 926<br>105 666 335               | BAC15          |
| ALN0AAA215YH17 | 131 335   | JS946481<br>JY043529 | minus<br>plus       | 105 747 150<br>105 615 815               | BAC17          |
| ALN0AAA212YO16 | 81 285    | JS943664<br>JS994048 | minus<br>plus       | 105 862 090<br><105 763 626 <sup>2</sup> | BAC16          |

<sup>1</sup>Chr. 06 map is based on *X. tropicalis* genome assembly v9.0 available on Xenbase

<sup>2</sup>Precise position of plus end has not been reported but has to be outside of outer homology arm for our BAC16P1D1 construct which starts at position 105 763 626.

## Suppl. Table 2

### Primers for recombineering of insert 1 (reporter) into BAC 15

| Primer Name <sup>1</sup>     | Primer Sequences (5' – 3')                                                         |
|------------------------------|------------------------------------------------------------------------------------|
|                              | (black: BAC sequence; red: restriction site;<br>blue: insert sequence)             |
| Xt_Eya1_BAC15_GFP_H1_AscI_F  | CGATGGCTGGAGGGTTACACGCTCTGAAATGCACTTCTCTTA<br>TTTCTAGGTGCGCGCCTCTAAGCGCGGACACTTGAG |
| Xt_Eya1_BAC15_Amp_H2_AsiSI_R | AATTATCAAGGCCTGTCCCACTGGGAGAATCACCCTGCCCAC<br>TAAGTCTACGCGATCGCCGCTCAGTGGAACGAAAAC |
| Xt_Eya1_BAC15_FB             | ACAGGATATGGTCAGTTTGTATTTTTG                                                        |
| Xt_Eya1_BAC15_RB             | ACCCAAGAACAACACTGTCTT                                                              |
| Xt_Eya1_Amp_BAC15_FI         | GCGGTATCATTGCAGCACTG                                                               |
| Xt_Eya1_GFP_BAC15_RI         | TAGGTCAGGGTGGTCACGA                                                                |

<sup>1</sup>F: Forward primer for BAC recombineering;

R: Reverse primer for BAC recombineering;

FB: Forward primer binding to BAC adjacent to insertion for verification of insertion;

RB: Reverse primer binding to BAC adjacent to insertion for verification of insertion;

FI: Forward primer binding to insert for verification of insert orientation;

RI: Reverse primer binding to insert for verification of insert orientation

### Suppl. Table 3

#### Primers for recombineering of insert 1 (reporter) into BAC 16

| Primer Name <sup>1</sup>     | Primer Sequences (5' – 3')                                                         |
|------------------------------|------------------------------------------------------------------------------------|
|                              | (black: BAC sequence; red: restriction site;<br>blue: insert sequence)             |
| Xt_Eya1_BAC16_Amp_H1_AscI_F  | TTGGTTGTTTAAAGCACAGTTGACATAATATTGGTGTGTAACC<br>CTCCAGTGGCGCGCCGGCACTTTTCGGGGAAATGT |
| Xt_Eya1_BAC16_GFP_H2_AsiSI_R | TATATTGTCATGAGGAAGGAAATATGTGTACATTGCAGTCTA<br>CATTAAACGGATCGCTTCAGGTTTCAGGGGGAGGTG |
| Xt_Eya1_BAC16_FB             | GGACTTGCCTGAGATGCTGA                                                               |
| Xt_Eya1_BAC16_RB             | GTGGTTCTCCCAGAGAGCAA                                                               |
| Xt_Eya1_GFP_BAC16_FI         | ATGGCCGACAAGCAGAAGAA                                                               |
| Xt_Eya1_Amp_BAC16_RI         | TAATACCGCGCCACATAGCA                                                               |

<sup>1</sup>F: Forward primer for BAC recombineering;

R: Reverse primer for BAC recombineering;

FB: Forward primer binding to BAC adjacent to insertion for verification of insertion;

RB: Reverse primer binding to BAC adjacent to insertion for verification of insertion;

FI: Forward primer binding to insert for verification of insert orientation;

RI: Reverse primer binding to insert for verification of insert orientation

## Suppl. Table 4

### Primers for recombineering of insert 2 (deletion) into BAC15

| Primer Name <sup>1</sup>  | Primer Sequences (5' – 3')                                                   |
|---------------------------|------------------------------------------------------------------------------|
|                           | (black: BAC sequence; blue: insert sequence)                                 |
| Xt_Eya1_BAC15_P1H1_F      | AACTTAACAGCTGGGAAAGAAAAATCACTCTCAAAGTTGT<br>CTAAAATGTAGCTTGCAGTGGGCTTACATG   |
| Xt_Eya1_BAC15_P1H2_R      | ATAGAAGTTAATAAAAAAGCAAGATCCTATATTATCATTAG<br>CATAAGACA CGGCCGCTCTAGA ACTAGTG |
| Xt_Eya1_BAC15_P1H3_R      | AATAAGTGTCCGATAAATAATTAATTTAATCTCATTATAGA<br>CTTTTTCAGGCCGCTCTAGA ACTAGTG    |
| Xt_Eya1_BAC15_P1H4_R      | CATTTTACTTCAAGTCTCCCACCAGAACCGTACACTCTCC<br>ATACGGAAC CGGCCGCTCTAGA ACTAGTG  |
| Xt_Eya1_BAC15_P1H5_R      | CTGAGACGTTTACAGCAATGAAAACTGGTTAATTGAAAT<br>CCATAAAGCT CGGCCGCTCTAGA ACTAGTG  |
| Xt_Eya1_BAC15_P1H1_FB     | ACAGCTGGGAAAGAAAAATCACT                                                      |
| Xt_Eya1_BAC15_P1H2_RB     | ACAGCTGGGAAAGAAAAATCACT                                                      |
| Xt_Eya1_BAC15_P1H3_RB     | TGGCATTGCAAACATTCTGG                                                         |
| Xt_Eya1_BAC15_P1H4_RB     | GTTTTACCAACGCAGGGCAA                                                         |
| Xt_Eya1_BAC15_P1H5_RB     | ACCATGAAAAGCAAACATTGGT                                                       |
| Xt_Eya1_BAC15_KanaP1H1_RI | CACGGCATACTTTACGCAGC                                                         |
| Xt_Eya1_BAC15_KanaP1H2_RI | CGGACCGCTATCAGGACATAG                                                        |
| Xt_Eya1_BAC15_P2H1_F      | CACATAACAGCAATTCCATGACACCAAATGGCACAGAAG<br>GTGAGTCCCAAGCTTGCAGTGGGCTTACATG   |
| Xt_Eya1_BAC15_P2H2_R      | GGGAAATGTTTTTCAGAGAAAAGGGATAACTCAAGCA<br>CATAGCATGT CGGCCGCTCTAGA ACTAGTG    |
| Xt_Eya1_BAC15_P2H3_R      | GCTATAACATTGTATTGAGCCTTTACACATTCTCATAAAGA<br>GTTTGTTCA CGGCCGCTCTAGA ACTAGTG |
| Xt_Eya1_BAC15_P2H4_R      | CAACGCGCCATAAATTAATTAGCAACTACATATATGATGG<br>CTCCCTGTG CGGCCGCTCTAGA ACTAGTG  |
| Xt_Eya1_BAC15_P2H5_R      | AATTTGCTAAGCAACCAGCCACAGTGTTCACTAGACTCA<br>TGCTGTGCCCGGCCGCTCTAGA ACTAGTG    |
| Xt_Eya1_BAC15_P2H1_FB     | CACAGGATATGGTCAGTTTGTATTTTT                                                  |
| Xt_Eya1_BAC15_P2H2_RB     | GGGAAATGTTTTTCAGAGAAAAGGGA                                                   |
| Xt_Eya1_BAC15_P2H3_RB     | AGTAAGATGAAGTGTATGCAAAGGTG                                                   |
| Xt_Eya1_BAC15_P2H4_RB     | GTTGGCAACCTTACACCCTT                                                         |
| Xt_Eya1_BAC15_P2H5_RB     | AGCGCCGACTATACCTGATG                                                         |

<sup>1</sup>F: Forward primer for BAC recombineering;

R: Reverse primer for BAC recombineering;

FB: Forward primer binding to BAC adjacent to insertion for verification of insertion;

RB: Reverse primer binding to BAC adjacent to insertion for verification of insertion;

FI: Forward primer binding to insert for verification of insert orientation;

RI: Reverse primer binding to insert for verification of insert orientation

Suppl. Table 5

Primers for recombineering of insert 2 (deletion) into BAC16

| Primer Name <sup>1</sup> | Primer Sequences (5' – 3')<br>(black: BAC sequence; blue: insert sequence)  |
|--------------------------|-----------------------------------------------------------------------------|
| Xt_Eya1_BAC16_P1H3_F     | CGAATTAATAAAGTTGTGTGCATCAATAAAAAATGGTT<br>AATGATAGAATAGCTTGCAGTGGGCTTACATG  |
| Xt_Eya1_BAC16_P1H4_R     | AGGGCAGCACTCCTAGGATTAAGAGAAAAATCGTAAA<br>CTAAAAGATAAAACGGCCGCTCTAGAACTAGTG  |
| Xt_Eya1_BAC16_P1H5_R     | ATTTGTACAAGGTAATCTTGGAACTACTCTGTAAGCAT<br>GTCCATAATGGCTCGGCCGCTCTAGAACTAGTG |
| Xt_Eya1_BAC16_P1H6_R     | TACACCTGAAAGTCCACCTTGAGGGTCAGTTAGGATG<br>AGATTTGTGAAATAAGGCCGCTCTAGAACTAGTG |
| Xt_Eya1_BAC16_P1H7_R     | TCGTGACTCGTGACTGACTATTGTTTTTTTGTCCATCA<br>GGAAACCATTGTAGGCCGCTCTAGAACTAGTG  |
| Xt_Eya1_BAC16_P1H3_FB    | ACTGTCATCCTGTGCAAAGGT                                                       |
| Xt_Eya1_BAC16_P1H4_RB    | AGGGCAGCACTCCTAGGAT                                                         |
| Xt_Eya1_BAC16_P1H5_RB    | AAAAAGGGGGCTCAGGGAAA                                                        |
| Xt_Eya1_BAC16_P1H6_RB    | TCATTTGGCATTTCGTATCTTTAGAGA                                                 |
| Xt_Eya1_BAC16_P1H7_RB    | ATGGGAGACTTTCCTTGGGC                                                        |
| Xt_Eya1_BAC16_P2H1_F     | AATAAAACCAGGACATTCATAGGAAAGTGTGGCCATTT<br>GGGATTGCCCTTAGCTTGCAGTGGGCTTACATG |
| Xt_Eya1_BAC16_P2H2_R     | AAGGTCGCAGGCATGTAAAAAAGTTGCAGTTGTGTCA<br>AAAAAGTTACGGCGGCCGCTCTAGAACTAGTG   |
| Xt_Eya1_BAC16_P2H3_R     | TTCTGCAGCCCGCCTCCCTCAACTTGCTTCATTGAATC<br>CCTGTATAAGACCGGCCGCTCTAGAACTAGTG  |
| Xt_Eya1_BAC16_P2H4_R     | AAGTTTGGGTCACTATAGCATAAGTATCTTTAACCATG<br>AGAAGTGTGTTCCGGCCGCTCTAGAACTAGTG  |
| Xt_Eya1_BAC16_P2H5_R     | TACTCTGTATGTCCAATGTATGAAACCCACTTATTGTAC<br>AGCGCTGCGGACGGCCGCTCTAGAACTAGTG  |
| Xt_Eya1_BAC16_P2H1_RB    | CTCAAGGGGCTGAGAAGTGA                                                        |
| Xt_Eya1_BAC16_P2H2_FB    | AAAGGTTGGGATCCCTATGC                                                        |
| Xt_Eya1_BAC16_P2H3_FB    | TCACAACCTCTGGTCATGCC                                                        |
| Xt_Eya1_BAC16_P2H4_FB    | CTGCCCTCAGTGTAGCCAA                                                         |
| Xt_Eya1_BAC16_P2H5_FB    | CCAAGGTAATATAAGAGCTCTCAGC                                                   |

<sup>1</sup>F: Forward primer for BAC recombineering;  
R: Reverse primer for BAC recombineering;  
FB: Forward primer binding to BAC adjacent to insertion for verification of insertion;  
RB: Reverse primer binding to BAC adjacent to insertion for verification of insertion;
